# Supplementary material for: Hypo-Osmoregulatory Roles of Vasotocinergic and Isotocinergic Systems in the Intestines of Two European Sea Bass Lineages
Source: MDPI journal article supplement (doi:10.3390/ijms232113636), 2022-11-07

Table S1: AVTRV and ITR sequences used in phylogenetic analyses and sequences

| Fish species                  | Genes  | Sequence ID         | Fish species                | Genes | Sequence ID          |
|-------------------------------|--------|---------------------|-----------------------------|-------|----------------------|
| <i>Dicentrarchus labrax</i>   | V2B1   | DLAgn_00092800      | <i>Lepisosteus oculatus</i> | ITR   | ENSDARP00000050113_1 |
|                               | V2B2   | DLAgn_00089180      |                             | V2B   | ENSLACP00000015306_1 |
|                               | V2A1   | DLAgn_00131190      |                             | V1A   | ENSGACP00000004706_1 |
|                               | V2A2   | DLAgn_00125320      |                             | V2A   | ENSGACP00000014075_1 |
|                               | V1A1   | DLAgn_00209950      | <i>Gallus gallus</i>        | V2C   | JH591411.1           |
|                               | V1A2   | DLAgn_00170900      |                             | V2C   | ENSGALG00000009497   |
|                               | V2C    | DLAgn_00207720      |                             | V1A   | ENSGALG00000009808   |
|                               | ITR1   | DLAgn_00093190      |                             | OTR   | ENSGALG00000003138   |
|                               | ITR2   | DLAgn_00093990      |                             | V1B   | ENSGALG00000000788   |
| <i>Oreochromis niloticus</i>  | V1Aa   | XM_003443925.5      |                             | V2C   | ENSMGAG00000009257   |
|                               | V2A1   | XM_003448162.5      | <i>Danio rerio</i>          | V2C   | ENSDARG00000076690   |
|                               | V2B2   | XM_003442789.5      |                             | ITR1  | ENSDARG00000033956   |
|                               | V2B1   | XM_025907435.1      |                             | V2B   | ENSDARG00000076797   |
|                               | ITR1   | XM_003441444.5      |                             | ITR2  | ENSDARG00000044175   |
|                               | ITR2   | XM_003448399.3      |                             | V2A1  | ENSDARG00000029219   |
|                               |        |                     |                             | V2A2  | ENSDARG0000007436    |
| <i>Gasterosteus aculeatus</i> | V2C    | ENSGACG00000018884  | <i>Latimeria chalumnae</i>  | V1Aa  | ENSDARG00000077083   |
|                               | V2A1   | ENSGACG00000008681  |                             | ITR   | ENSLACG00000018362   |
|                               | V2A2   | ENSGACG00000010636  |                             | V1B   | ENSLACG00000013680   |
|                               | V1Aa   | ENSGACG00000003589  |                             | V1A   | ENSLACG00000014523   |
|                               | V1Ab   | ENSGACG00000000737  |                             | V2A   | ENSLACG00000014898   |
|                               | V2B    | ENSGACG00000000754  |                             | V2B   | ENSLACG00000013474   |
|                               | ITR1   | ENSGACG00000000914  | <i>Oryzias latipes</i>      | ITR1  | ENSORLGG00000000719  |
| <i>Xiphophorus maculatus</i>  | V1Aa   | ENSXMAG00000017820  |                             | V2B   | ENSORLGG00000001494  |
|                               | ITR2   | ENSXMAG00000016299  |                             | ITR2  | ENSORLGG00000003297  |
|                               | ITR1   | ENSXMAG00000001524  |                             | V1Aa  | ENSORLGG00000002126  |
|                               | V2A1   | ENSXMAG00000010783  |                             | V2A1  | ENSORLGG00000007088  |
|                               | V2A2   | ENSXMAG00000009554  |                             | V2A2  | ENSORLGG00000016671  |
|                               | V2C    | ENSXMAG00000009218  |                             | V1Ab  | ENSORLGG00000017245  |
|                               | V2B(1) | ENSXMAG00000001906  | <i>Takifugu rubripes</i>    | V2B   | ENSTRUG00000001010   |
|                               | V2B(2) | ENSXMAG00000002230  |                             | V2A2  | ENSTRUG00000000643   |
| <i>Anolis carolinensis</i>    | V2A    | ENSACAG000000021016 |                             | V2A1  | ENSTRUG000000015164  |
|                               | V2C    | ENSACAG000000000005 |                             | V1Ab  | ENSTRUG000000016314  |
|                               | V1A    | ENSACAG000000000443 |                             | V1Aa  | ENSTRUG000000006025  |
|                               | V1B    | ENSACAG000000012849 |                             |       |                      |

| Fish species               | Genes | Sequence ID         | Fish species              | Genes | Sequence ID         |
|----------------------------|-------|---------------------|---------------------------|-------|---------------------|
| <i>Anolis carolinensis</i> | OTR   | ENSACAG00000011241  | <i>Takifugu rubripes</i>  | ITR2  | SINFRUG00000140687  |
| <i>Xenopus tropicalis</i>  | OTR   | ENSXETG00000001441  |                           | ITR1  | ENSTRUG00000003223  |
|                            | V2A   | ENSXETG000000014233 | <i>Mus musculus</i>       | OTR   | ENSMUSG000000049112 |
|                            | V2C   | ENSXETG000000015741 |                           | V1A   | ENSMUSG000000020123 |
|                            | V1A   | ENSXETG000000018781 |                           | V2A   | ENSMUSG000000031390 |
|                            | V1B   | ENSXETG000000005930 |                           | V1B   | ENSMUSG000000026432 |
| <i>Homo sapiens</i>        | V1B   | ENSG00000198049     | <i>Ciona intestinalis</i> | VPR   | ENSCING000000006620 |
|                            | OTR   | ENSG00000180914     | <i>Octopus vulgaris</i>   | OPR   | AB158496.1          |
|                            | V1A   | ENSG00000166148     |                           | CTR1  | AB158493.1          |
|                            | V2A   | ENSG00000126895     |                           | CTR2  | AB158495.1          |

Fig. S1 Sequence logos in selected regions of mammalian and fish V1a/V1a1 compared to *D. labrax* V1a1 (first two lines), mammalian and fish V1a/V1a2 compared to *D. labrax* V1a2 (third and fourth line) and mammalian and fish OTR/ITR1 compared to *D. labrax* ITR1. Black asterisks indicate putative OXT/AVP ligand binding amino acids in mammalian receptors (Chini and Fanelli, 2000; Koehbach et al., 2013). Red asterisks indicate important residues for AVT binding (Acharjee et al., 2004; Chini and Fanelli, 2000). Red boxes show important residues for oxytocin ligand selectivity, binding and signaling (Koehbach et al., 2013). Green boxes show amino acid differences between *D. labrax* V1a1 and V1a2. Sequence numbering corresponds to the human OXTR sequence (Accession no. NP\_001341583.1).

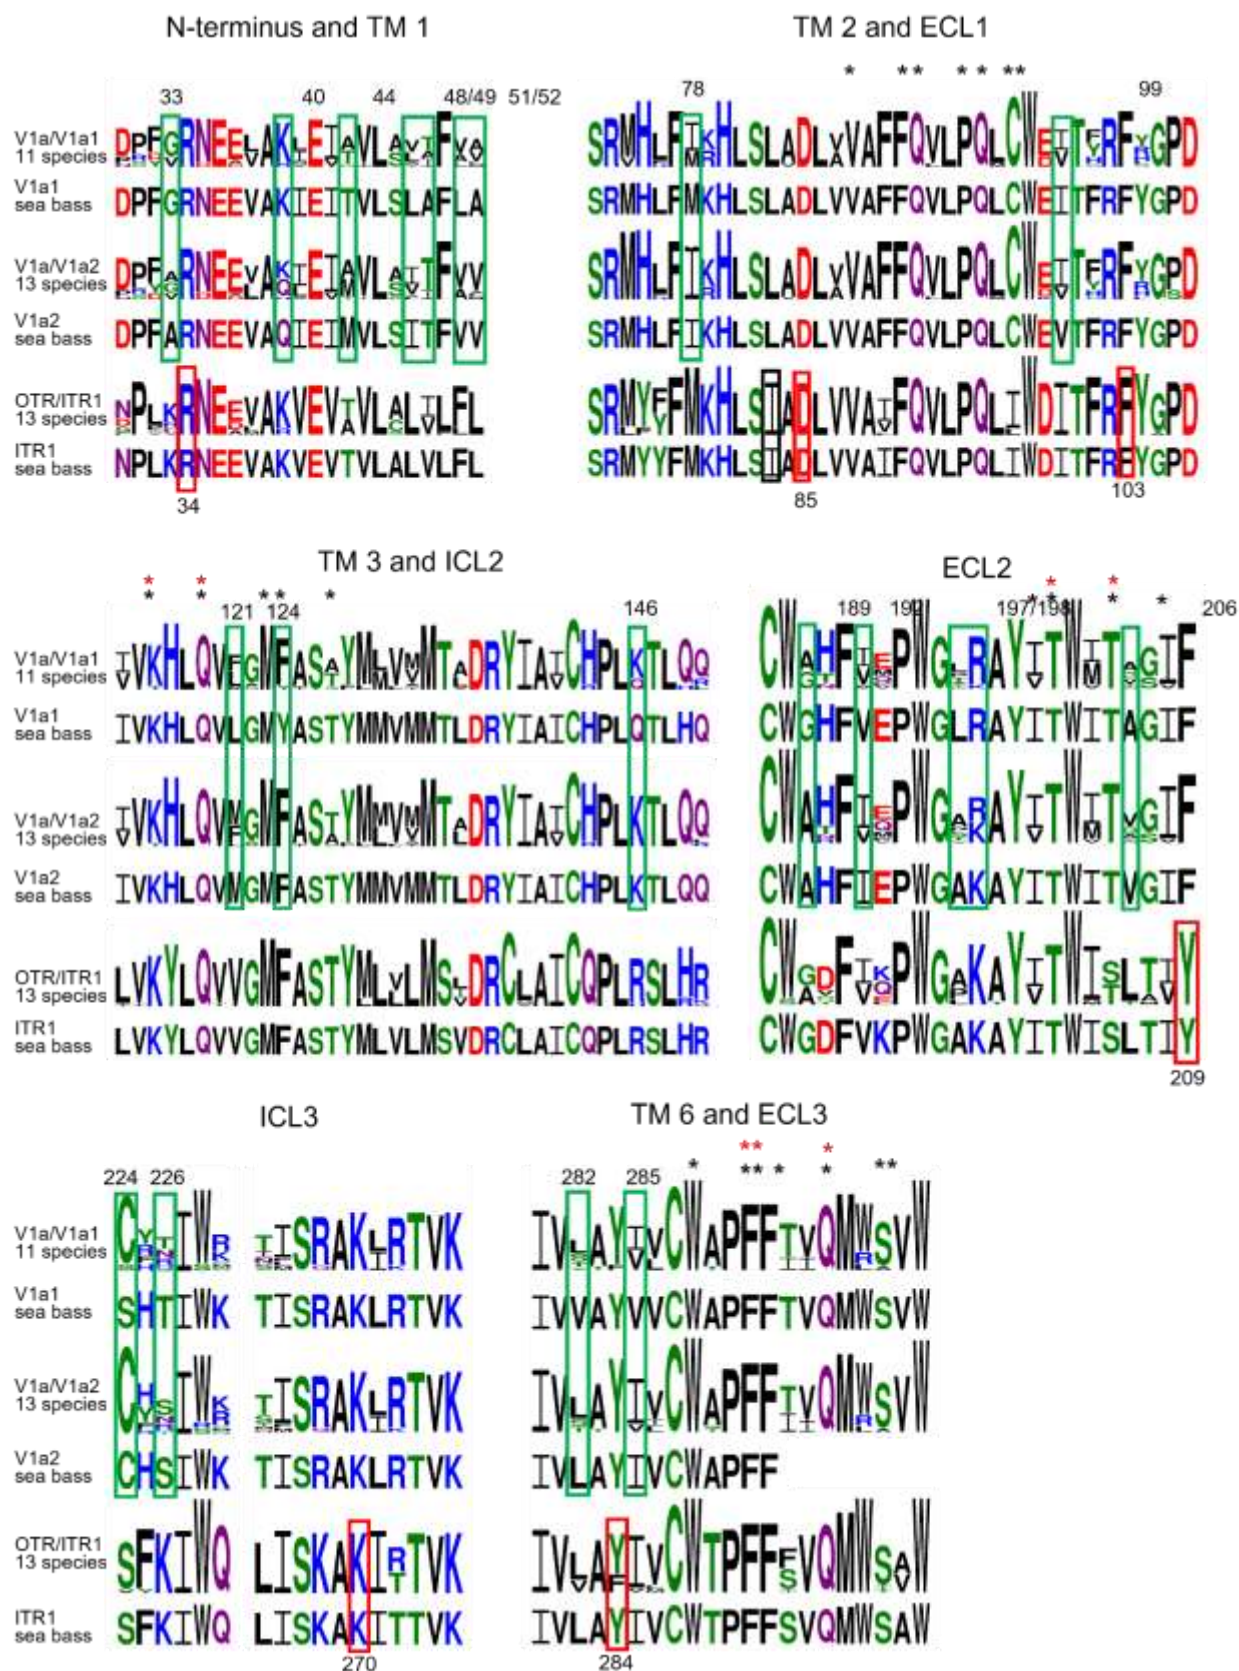

Fig. S2 Relative *avtrv2b2*, *avtrv2a2*, *avtrvc* and *itr2* mRNA expression were measured in the anterior intestines of Mediterranean (M) and Atlantic (A) European sea bass maintained in seawater (SW) and hypersaline water (HW). Different letters denote significant differences between groups (two-way ANOVA followed by Tukey's test,  $P < 0.05$ ,  $N = 11$ ). Data are represented as the median, first and third quartile (box), minimum and maximum values.

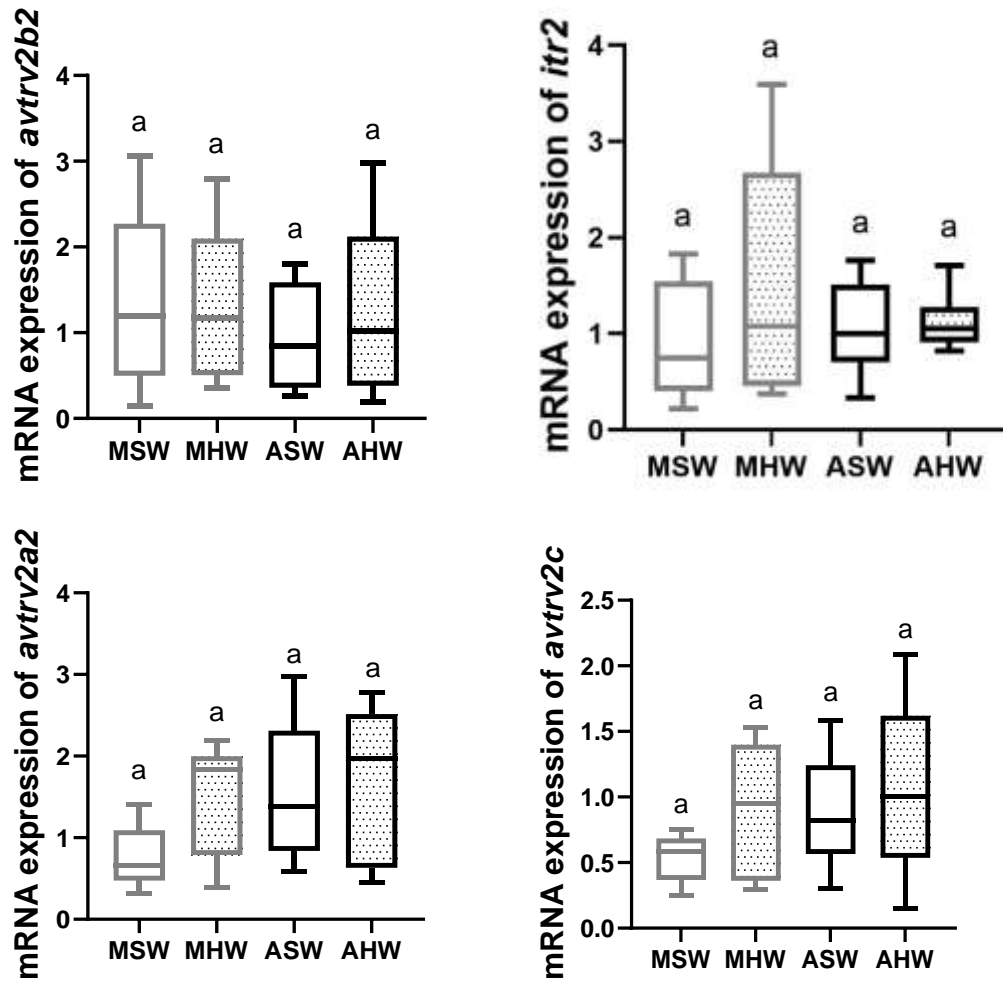

Fig. S3 Relative *avtrv2a1*, *avtrv2a2*, *avtrv2b2*, *avtrv2c* and *itr2* mRNA expression were measured in the posterior intestines of Mediterranean (M) and Atlantic (A) European sea bass maintained in seawater (SW) and hypersaline water (HW). Different letters denote significant differences between groups (two-way ANOVA followed by Tukey's test,  $P < 0.05$ ,  $N = 11$ ). Data are represented as the median, first and third quartile (box), minimum and maximum values.

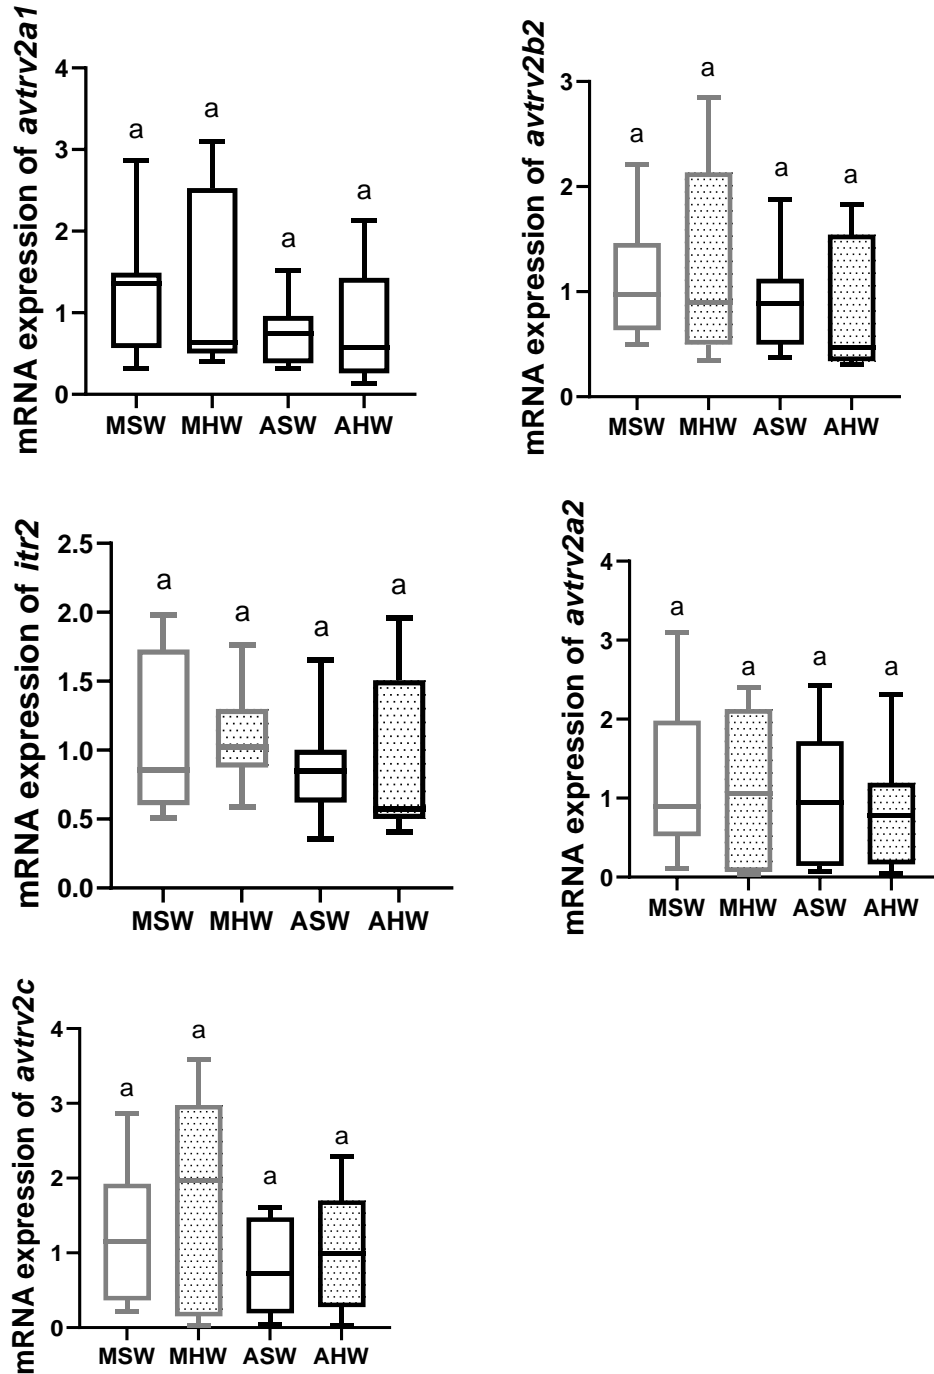

Supplement: s1 [file s1]
